# Supplementary material for: IL-33 citrine reporter mice reveal the temporal and spatial expression of IL-33 during allergic lung inflammation
Source: PubMed Central journal article supplement (PMC3734634; doi:10.1002/eji.201242863), 2012-11-21
Supplement: eji0043-0488-SD1.pdf [file eji0043-0488-SD1.pdf]

# **European Journal of Immunology**

**Supporting Information  
for**

**DOI 10.1002/eji.201242863**

Clare S. Hardman, Veera Panova and Andrew N. J. McKenzie

**IL-33 citrine reporter mice reveal the temporal and spatial expression of IL-33  
during allergic lung inflammation**

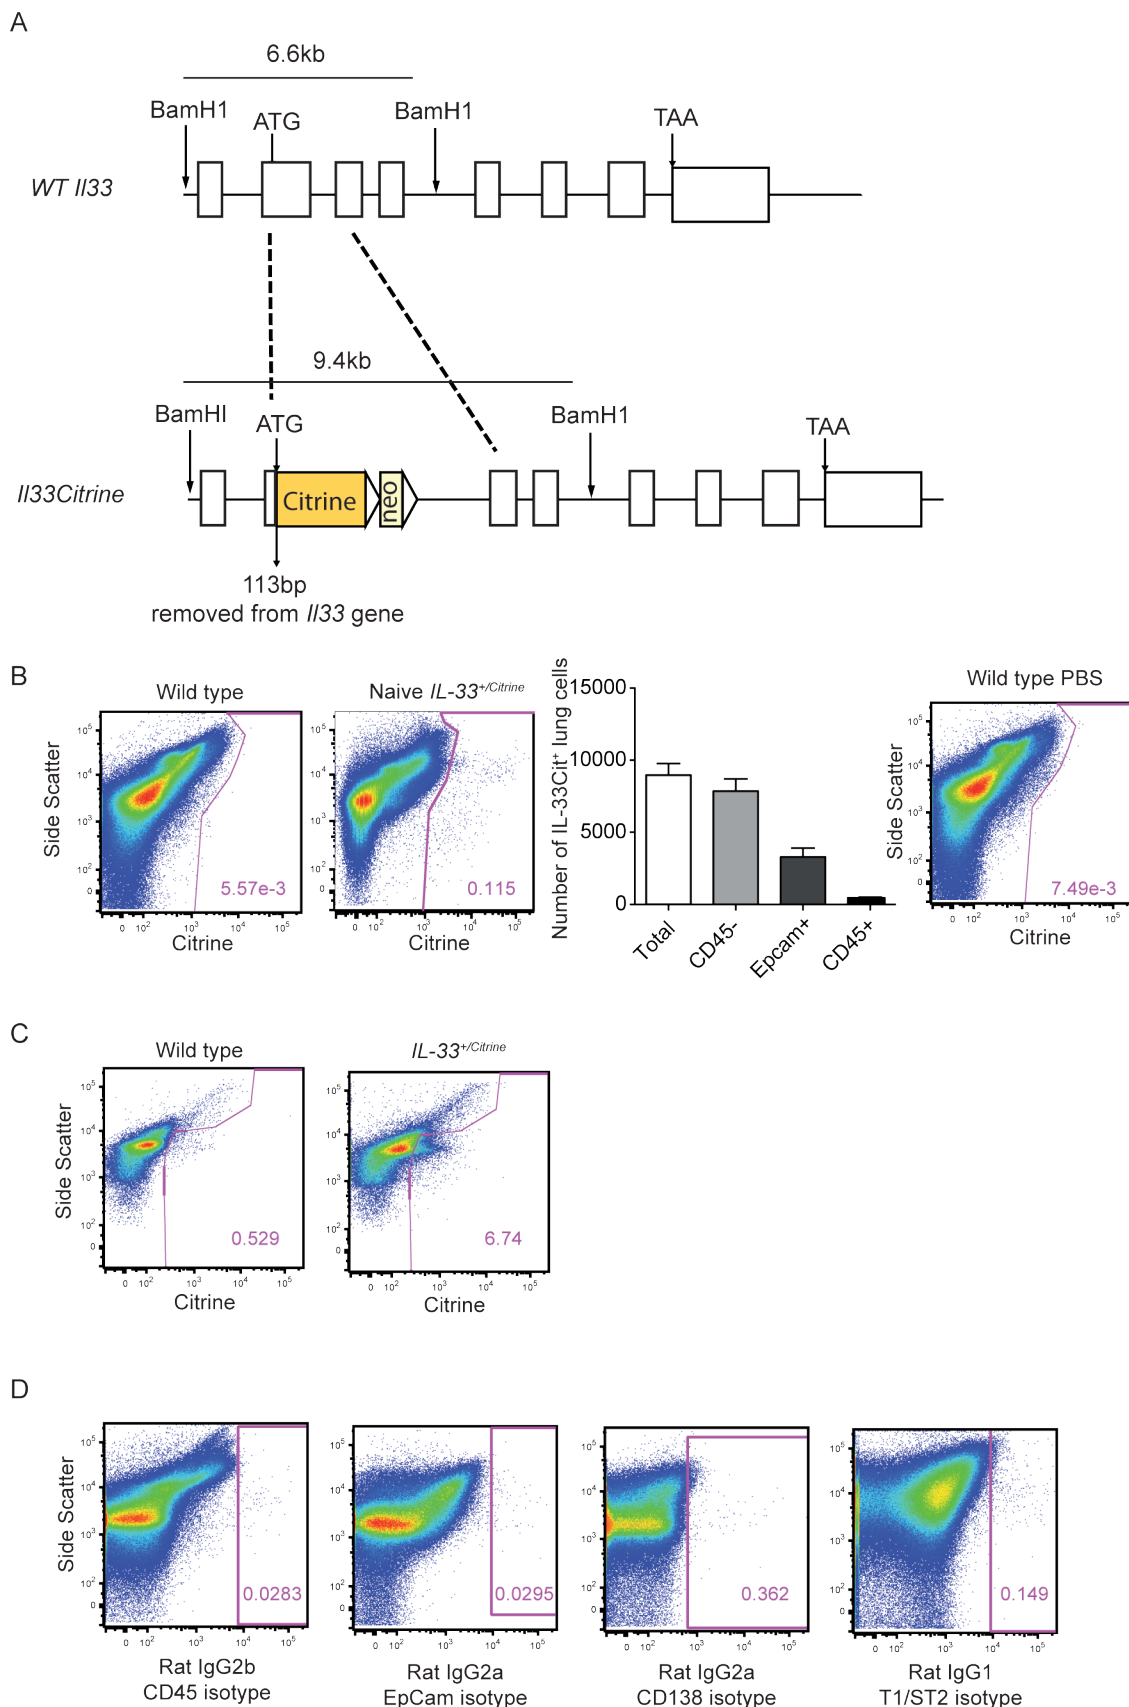

**Supporting Information Figure 1. Generation of an *IL-33Citrine* reporter and defining naïve *IL-33* expression.**

(A) Schematic of *Citrine* insertion into the *Il33* gene immediately down stream of the start codon. (B) Flow cytometry data of citrine expression in the lung tissue of naïve mice and citrine<sup>+</sup> cells' expression of epithelial cell markers n = 3 - 4. Data are representative of 6 independent experiments. Error bars represent mean $\pm$  SEM. (C) Flow cytometry data of citrine expression in the mediastinal lymph node tissue of naïve mice n = 4. Data are representative of 2 independent experiments. D. flow cytometry isotype controls for pneumocyte gating strategy i) CD45 ii) EpCam iii) CD138 iv) T1/ST2.

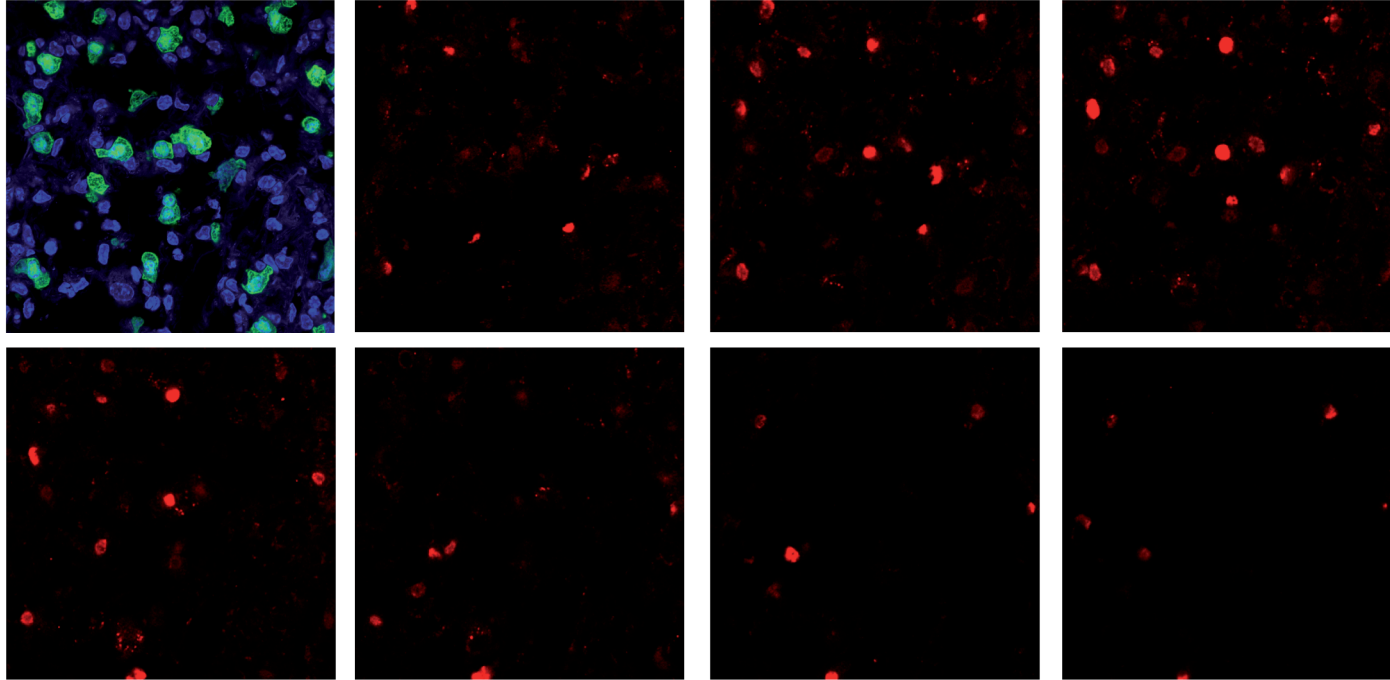

**Supporting Information Figure 2. Colocalisation of citrine and IL-33 antibody fluorescence.** Confocal image (63x) of lung citrine expression following OVA treatment, citrine (green) and DAPI (blue). With a 7-panel Z-stack (63x) showing anti IL-33 antibody staining (red) for the same field of view.

A

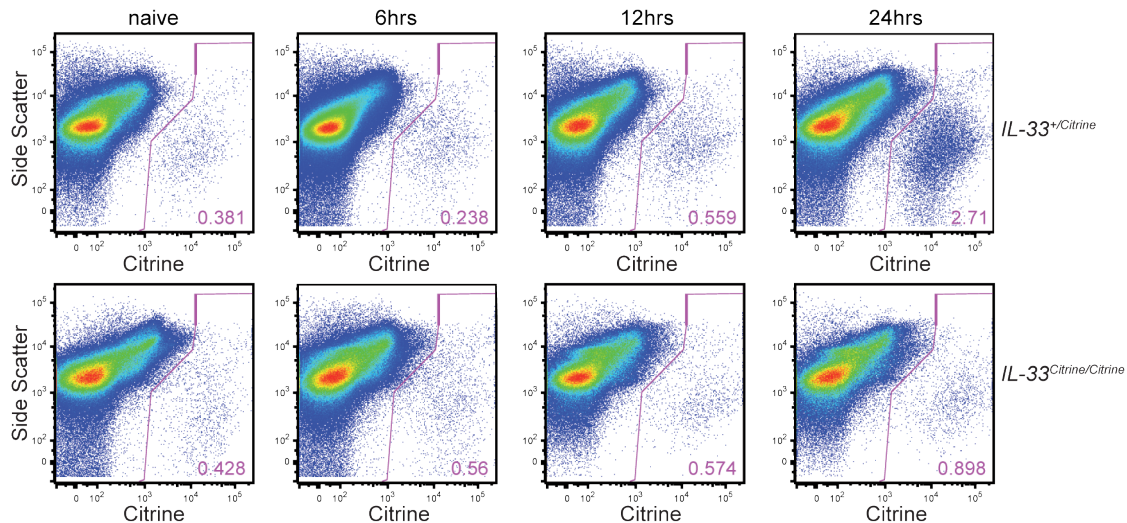

B

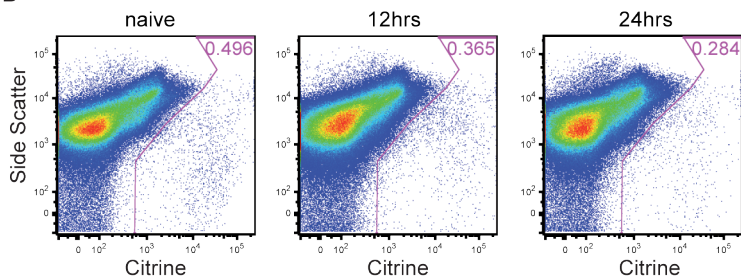

### Supporting Information Figure 3. Gating strategy for Figure 5 citrine expression.

(A) Citrine gating strategy induction of citrine expression for Fig. 5C. (B) Citrine gating strategy for Fig. 5D.
